# Supplementary material for: Ice mélange melt drives changes in observed water column stratification at a tidewater glacier in Greenland
Source: Copernicus journal article supplement (doi:10.5194/egusphere-2024-504), 2024-03-19
Supplement: Supplementary file 2 [file egusphere-2024-504-supplement.zip]

Archive with 2 entries (2 files):
- KangilliupSermia_timelapse_201408.mp4
- RinkMelange_supplement.pdf
